# Supplementary material for: Cryptic role of tetrathionate in the sulfur cycle: A study from Arabian Sea sediments
Source: Copernicus journal article supplement (doi:10.5194/bg-2019-471), 2019-12-17
Supplement: Supplementary file 1 [file Supplementary_Information.pdf › Supplementary_Information.pdf]

## **Supplementary Information for the article**

### **Cryptic role of tetrathionate in the sulfur cycle: A study from Arabian Sea sediments**

Subhrangshu Mandal<sup>1</sup>, Sabyasachi Bhattacharya<sup>1</sup>, Chayan Roy<sup>1</sup>, Moidu Jameela Rameez<sup>1</sup>, Jagannath Sarkar<sup>1</sup>, Tarunendu Mapder<sup>2</sup>, Svetlana Fernandes<sup>3</sup>, Aditya Peketi<sup>3</sup>, Aninda Mazumdar<sup>3,\*</sup> and Wriddhiman Ghosh<sup>1,\*</sup>

<sup>1</sup> Department of Microbiology, Bose Institute, P-1/12 CIT Scheme VIIM, Kolkata 700054, India.

<sup>2</sup> ARC CoE for Mathematical and Statistical Frontiers, School of Mathematical Sciences, Queensland University of Technology, Brisbane, QLD 4000, Australia.

<sup>3</sup> CSIR-National Institute of Oceanography, Dona Paula, Goa 403004, India.

**\* Correspondence emails:** wriman@jcbose.ac.in / maninda@nio.org

**Running Title:** Tetrathionate metabolism in OMZ sediments

## Contents

### Supplementary Figure

**Fig. S1.** Schematic diagram showing the sampling strategy adopted for the collection of sediment-samples from the SSK42 cores.

### Supplementary Tables

**Tables S1-S2.** Sediment-depths of SSK42/5 and SSK42/6 explored via duplicate metagenome sequencing and analysis of *in situ* microbial communities. Sequence accession numbers and basic statistics of the individual metagenome analyses are also given.

**Table S3.** Number of thiosulfate to tetrathionate-conversion genes identified within the metagenome assemblies obtained for the individual sediment-samples of SSK42/5 and SSK42/6. Since this Supplementary Table is more than one page long it has been provided as an Excel sheet named Table S3, within the Excel Workbook named Supplementary Dataset.

**Table S4.** Number of tetrathionate-oxidation genes identified within the metagenome assemblies obtained for the individual sediment-samples of SSK42/5 and SSK42/6. Since this Supplementary Table is more than one page long it has been provided as an Excel sheet named Table S4, within the Excel Workbook named Supplementary Dataset.

**Table S5.** Number of tetrathionate-reduction genes identified within the metagenome assemblies obtained for the individual sediment-samples of SSK42/5 and SSK42/6. Since this Supplementary Table is more than one page long it has been provided as an Excel sheet named Table S5, within the Excel Workbook named Supplementary Dataset.

**Tables S6-S7.** Pair-wise Pearson correlation and Spearman rank correlation coefficients calculated between the prevalence of two metabolic-types, or the prevalence of a particular metabolic-type and sediment-depth, in SSK42/5 and SSK42/6.

**Tables S8-S9.** Relative abundance along SSK42/5 and SSK42/6, for genera whose member species/strains have been reported for tetrathionate formation during their oxidation of thiosulfate to sulfate/ reduction of sulfate to sulfide.

**Tables S10-S11.** Relative abundance along SSK42/5 and SSK42/6, for genera whose member species/strains have been reported for tetrathionate oxidation.

**Tables S12-S13.** Relative abundance along SSK42/5 and SSK42/6, for genera whose member species/strains have been reported for tetrathionate reduction.

**Tables S14-S17.** Results of slurry incubation experiments with the sediment-samples of SSK42/5 and SSK42/6 in thiosulfate-containing chemolithoautotrophic medium.

**Table S18.** Results of slurry incubation experiments with the sediment-samples of SSK42/5 and SSK42/6 in tetrathionate-containing chemolithoautotrophic medium.

**Table S19.** Rate of oxidation (to sulfate) of tetrathionate during aerobic slurry incubation of various sediment-samples of SSK42/6 in tetrathionate-containing chemolithotrophic ASWTr medium.

**Table S20.** Genes for thiosulfate to tetrathionate conversion and tetrathionate oxidation identified within the contigs assembled from the metatranscriptomic sequence data obtained for the 275 cmbsf sediment-sample of SSK42/6. Since this Supplementary Table is more than one page long it has been provided as an Excel sheet named Table S20, within the Excel Workbook named Supplementary Dataset.

**Tables S21-S22.** Results of slurry incubation experiments with the sediment-samples of SSK42/5 and SSK42/6 in tetrathionate-containing heterotrophic medium.

**Table S23.** General features of the assembled genomes of the 6 tetrathionate metabolizing bacterial strains isolated from 275 cmbsf of SSK42/6, together with the percentages of metagenomic reads from individual sediment-samples of SSK42/5 and SSK42/6 that matched with sequences from each genome. Since this

Supplementary Table is more than one page long it has been provided as an Excel sheet named Table S23, within the Excel Workbook named Supplementary Dataset.

**Table S24.** Concentrations of sulfate, sulfide and thiosulfate in the individual sample-sites of SSK42/5 and SSK42/6.

**Table S25.** Thiosulfate to tetrathionate conversion genes of *Pseudomonas bauzanensis* MTCC 12600 and *Halomonas* sp. MCC 3301, tetrathionate/ thiosulfate oxidation genes of *Pusillimonas ginsengisoli* MTCC12558 and *Halothiobacillus* sp. SB14A, and the numbers of metatranscriptomic read-pairs from 275 cmbsf of SSK42/6 that matched concordantly with the individual genes of this catalog. Since this Supplementary Table is more than one page long it has been provided as an Excel sheet named Table S25, within the Excel Workbook named Supplementary Dataset.

**Table S26.** Number of aerobic-respiration-related genes identified within the metatranscriptome assemblies obtained for 275 cmbsf of SSK42/6. Since this Supplementary Table is more than one page long it has been provided as an Excel sheet named Table S26, within the Excel Workbook named Supplementary Dataset.

**Table S27.** Aerobic-respiration-related genes, other than cytochrome oxidases, identified within the metatranscriptome assemblies obtained for 275 cmbsf of SSK42/6. Since this Supplementary Table is more than one page long it has been provided as an Excel sheet named Table S27, within the Excel Workbook named Supplementary Dataset.

**Supplementary References**

## Supplementary Figure

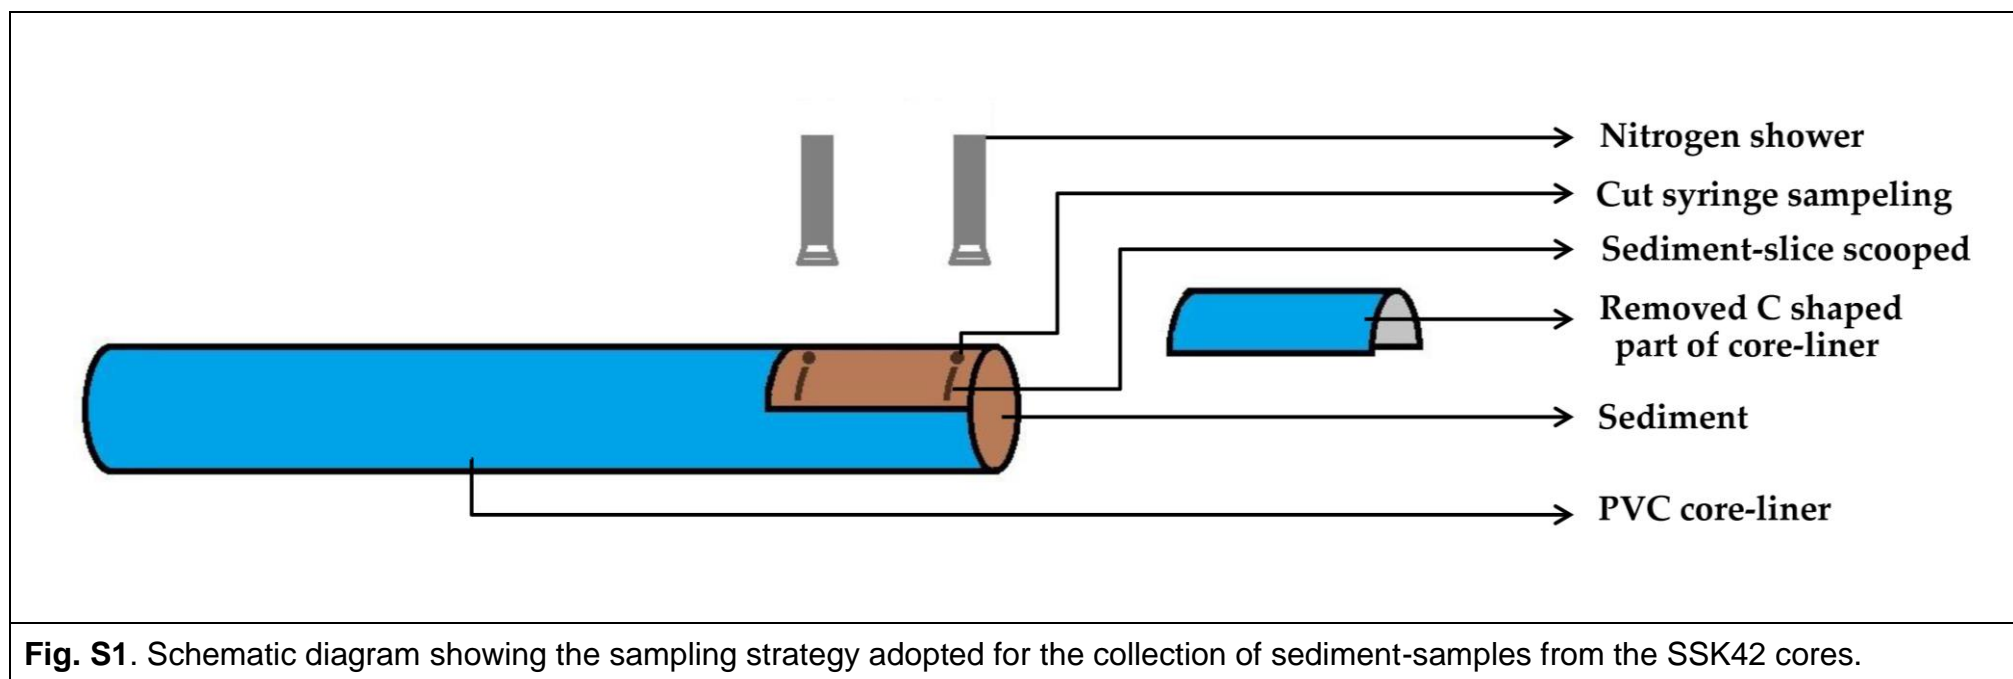

## Supplementary Tables

**Table S1.** List of sedimentary communities investigated along SSK42/5 together with the accession numbers of the metagenomic sequence datasets

| Sediment-depths explored<br>(in cmbsf) | BioSample accession number | Sample-replicate | Run accession number |
|----------------------------------------|----------------------------|------------------|----------------------|
| 0                                      | SAMN04442175               | 1st replicate    | SRR3646127           |
|                                        |                            | 2nd replicate    | SRR3646128           |
| 15                                     | SAMN04442176               | 1st replicate    | SRR3646129           |
|                                        |                            | 2nd replicate    | SRR3646130           |
| 45                                     | SAMN04442177               | 1st replicate    | SRR3646131           |
|                                        |                            | 2nd replicate    | SRR3646132           |
| 60                                     | SAMN04442178               | 1st replicate    | SRR3646144           |
|                                        |                            | 2nd replicate    | SRR3646145           |
| 90                                     | SAMN04442179               | 1st replicate    | SRR3646147           |
|                                        |                            | 2nd replicate    | SRR3646148           |
| 120                                    | SAMN04442180               | 1st replicate    | SRR3646150           |
|                                        |                            | 2nd replicate    | SRR3646151           |
| 140                                    | SAMN04442181               | 1st replicate    | SRR3646152           |
|                                        |                            | 2nd replicate    | SRR3646153           |
| 160                                    | SAMN04442182               | 1st replicate    | SRR3646155           |
|                                        |                            | 2nd replicate    | SRR3646156           |
| 190                                    | SAMN04442183               | 1st replicate    | SRR3646157           |
|                                        |                            | 2nd replicate    | SRR3646158           |
| 220                                    | SAMN04442184               | 1st replicate    | SRR3646160           |
|                                        |                            | 2nd replicate    | SRR3646161           |
| 260                                    | SAMN04442185               | 1st replicate    | SRR3646162           |
|                                        |                            | 2nd replicate    | SRR3646163           |
| 295                                    | SAMN04442186               | 1st replicate    | SRR3646164           |
|                                        |                            | 2nd replicate    | SRR3646165           |

**Table S2.** List of sedimentary communities investigated along SSK42/6 together with the accession numbers of the metagenomic sequence datasets

| Sediment-depths explored<br>(in cmbsf) | BioSample accession number | Sample-replicate | Run accession number |
|----------------------------------------|----------------------------|------------------|----------------------|
| 2                                      | SAMN04442187               | 1st replicate    | SRR3570036           |
|                                        |                            | 2nd replicate    | SRR3570038           |
| 30                                     | SAMN04442189               | 1st replicate    | SRR3577067           |
|                                        |                            | 2nd replicate    | SRR3577068           |
| 45                                     | SAMN04442190               | 1st replicate    | SRR3577070           |
|                                        |                            | 2nd replicate    | SRR3577071           |
| 60                                     | SAMN04442191               | 1st replicate    | SRR3577073           |
|                                        |                            | 2nd replicate    | SRR3577076           |
| 75                                     | SAMN04442192               | 1st replicate    | SRR3577078           |
|                                        |                            | 2nd replicate    | SRR3577079           |
| 90                                     | SAMN04442193               | 1st replicate    | SRR3577081           |
|                                        |                            | 2nd replicate    | SRR3577082           |
| 120                                    | SAMN04442195               | 1st replicate    | SRR3577086           |
|                                        |                            | 2nd replicate    | SRR3577087           |
| 135                                    | SAMN04442196               | 1st replicate    | SRR3577090           |
|                                        |                            | 2nd replicate    | SRR3577311           |
| 160                                    | SAMN04442198               | 1st replicate    | SRR3577334           |
|                                        |                            | 2nd replicate    | SRR3577335           |
| 175                                    | SAMN04442199               | 1st replicate    | SRR3577337           |
|                                        |                            | 2nd replicate    | SRR3577338           |
| 220                                    | SAMN04442202               | 1st replicate    | SRR3577341           |
|                                        |                            | 2nd replicate    | SRR3577343           |
| 250                                    | SAMN04442204               | 1st replicate    | SRR3577344           |
|                                        |                            | 2nd replicate    | SRR3577345           |
| 275                                    | SAMN04442207               | 1st replicate    | SRR3577350           |
|                                        |                            | 2nd replicate    | SRR3577351           |

**Table S6.** Pair-wise Pearson correlation coefficient (CC denoted as  $r$ ) and Spearman rank correlation coefficient (RCC denoted as  $\rho$ ) calculated between the prevalence<sup>1</sup> of two metabolic-types, or the prevalence<sup>1</sup> of a particular metabolic-type and sediment-depth<sup>2</sup>, in SSK42/5.

| Pearson correlation coefficient                |                |                                               |                                              |                                                |         |
|------------------------------------------------|----------------|-----------------------------------------------|----------------------------------------------|------------------------------------------------|---------|
|                                                | Sediment depth | Prevalence of tetrathionate-reducing bacteria | Prevalence of tetrathionate-forming bacteria | Prevalence of tetrathionate-oxidizing bacteria | P value |
| Sediment-depth                                 |                | 2.06E-04                                      | 4.62E-04                                     | 6.99E-05                                       |         |
| Prevalence of tetrathionate-reducing bacteria  | 0.8734         |                                               | 1.24E-06                                     | 2.12E-08                                       |         |
| Prevalence of tetrathionate-forming bacteria   | 0.85           | 0.9557                                        |                                              | 4.76E-06                                       |         |
| Prevalence of tetrathionate-oxidizing bacteria | 0.899          | 0.9805                                        | 0.9418                                       |                                                |         |
|                                                | r value        |                                               |                                              |                                                |         |
| Spearman rank correlation coefficient          |                |                                               |                                              |                                                |         |
|                                                | Sediment depth | Prevalence of tetrathionate-reducing bacteria | Prevalence of tetrathionate-forming bacteria | Prevalence of tetrathionate-oxidizing bacteria | P value |
| Sediment-depth                                 |                | 9.70E-04                                      | 3.09E-04                                     | 0                                              |         |
| Prevalence of tetrathionate-reducing bacteria  | 0.8462         |                                               | 9.17E-05                                     | 5.97E-04                                       |         |
| Prevalence of tetrathionate-forming bacteria   | 0.8741         | 0.8881                                        |                                              | 1.92E-04                                       |         |
| Prevalence of tetrathionate-oxidizing bacteria | 0.9301         | 0.8601                                        | 0.8811                                       |                                                |         |
|                                                | r value        |                                               |                                              |                                                |         |

<sup>1</sup> Prevalence of a particular metabolic-type in the microbial community of a given sediment-depth was quantified as the percentage of total metagenomic reads from the sediment-sample that was ascribed to the set of genera typifying the metabolism.

<sup>2</sup> Sediment-depth was quantified in centimeters (below the sea-floor).

**Table S7.** Pair-wise Pearson correlation coefficient (CC denoted as  $r$ ) and Spearman rank correlation coefficient (RCC denoted as  $\rho$ ) calculated between the prevalence<sup>1</sup> of two metabolic-types, or the prevalence<sup>1</sup> of a particular metabolic-type and sediment-depth<sup>2</sup>, in SSK42/6.

| Pearson correlation coefficient                |                |                                               |                                              |                                                |         |
|------------------------------------------------|----------------|-----------------------------------------------|----------------------------------------------|------------------------------------------------|---------|
|                                                | Sediment depth | Prevalence of tetrathionate-reducing bacteria | Prevalence of tetrathionate-forming bacteria | Prevalence of tetrathionate-oxidizing bacteria | P value |
| Sediment-depth                                 |                | 1.63E-01                                      | 3.30E-03                                     | 1.48E-02                                       |         |
| Prevalence of tetrathionate-reducing bacteria  | 0.4109         |                                               | 6.36E-02                                     | 4.68E-02                                       |         |
| Prevalence of tetrathionate-forming bacteria   | 0.7483         | 0.528                                         |                                              | 8.02E-02                                       |         |
| Prevalence of tetrathionate-oxidizing bacteria | 0.6566         | 0.5594                                        | 0.5024                                       |                                                |         |
|                                                | r value        |                                               |                                              |                                                |         |
| Spearman rank correlation coefficient          |                |                                               |                                              |                                                |         |
|                                                | Sediment depth | Prevalence of tetrathionate-reducing bacteria | Prevalence of tetrathionate-forming bacteria | Prevalence of tetrathionate-oxidizing bacteria | P value |
| Sediment-depth                                 |                | 1.10E-01                                      | 1.40E-03                                     | 0.0044                                         |         |
| Prevalence of tetrathionate-reducing bacteria  | 0.467          |                                               | 7.50E-03                                     | 6.73E-02                                       |         |
| Prevalence of tetrathionate-forming bacteria   | 0.8077         | 0.7198                                        |                                              | 4.40E-03                                       |         |
| Prevalence of tetrathionate-oxidizing bacteria | 0.7527         | 0.5275                                        | 0.7527                                       |                                                |         |
|                                                | r value        |                                               |                                              |                                                |         |

<sup>1</sup> Prevalence of a particular metabolic-type in the microbial community of a given sediment-depth was quantified as the percentage of total metagenomic reads from the sediment-sample that was ascribed to the set of genera typifying the metabolism.

<sup>2</sup> Sediment-depth was quantified in centimeters (below the sea-floor).



**Table S8.** Relative abundance, along SSK42/5, for such genera, some member species/strains of which have been reported for tetrathionate-formation during the oxidation of thiosulfate to sulfate.

|                          |                             |                                                                                    | Sediment-depth (in cmbsf)                                          |      |      |      |      |      |      |      |      |      |      |      |
|--------------------------|-----------------------------|------------------------------------------------------------------------------------|--------------------------------------------------------------------|------|------|------|------|------|------|------|------|------|------|------|
| Genera                   | Reference                   | Tetrathionate-forming phenotype                                                    | 0                                                                  | 15   | 45   | 60   | 90   | 120  | 140  | 160  | 190  | 220  | 260  | 295  |
|                          |                             |                                                                                    | Mean relative abundance (as percentage of total metagenomic reads) |      |      |      |      |      |      |      |      |      |      |      |
| <i>Acidithiobacillus</i> | (Hedrich and Johnson, 2013) | (i) $S_2O_3 \rightarrow S_4O_6 \rightarrow SO_4$<br>(ii) $S_4O_6 \rightarrow SO_4$ | 0.06                                                               | 0.04 | 0.04 | 0.07 | 0.49 | 0.42 | 0.24 | 0.12 | 0.16 | 0.32 | 0.17 | 0.26 |
| <i>Advenella</i>         | (Ghosh et al., 2005)        |                                                                                    | 0                                                                  | 0    | 0    | 0    | 0    | 0    | 0    | 0    | 0    | 0    | 0    | 0    |
| <i>Halothiobacillus</i>  | (Boden et al., 2017)        |                                                                                    | 0.03                                                               | 0.02 | 0.05 | 0.04 | 0.22 | 0.26 | 0.19 | 0.25 | 0.27 | 0.26 | 0.29 | 0.36 |
| <i>Paracoccus</i>        | (Rameez et al., 2019)       |                                                                                    | 0.05                                                               | 0.21 | 1.13 | 0.35 | 0.09 | 0.11 | 0.07 | 0.21 | 0.08 | 0.33 | 0.07 | 0.12 |
| <i>Pusillimonas</i>      | This study                  |                                                                                    | 0.01                                                               | 0.01 | 0.01 | 0.01 | 0.02 | 0.03 | 0.03 | 0.04 | 0.03 | 0.04 | 0.06 | 0.03 |
| <i>Thiomicrospira</i>    | (Watsuji et al., 2016)      |                                                                                    | 0.07                                                               | 0.05 | 0.11 | 0.12 | 0.53 | 0.55 | 0.50 | 0.65 | 0.81 | 0.68 | 0.98 | 0.99 |
| Total percentage         |                             |                                                                                    | 0.22                                                               | 0.33 | 1.34 | 0.59 | 1.36 | 1.37 | 1.03 | 1.28 | 1.36 | 1.63 | 1.57 | 1.76 |

**Table S9.** Relative abundance, along SSK42/6, for such genera, some member species/strains of which have been reported for tetrathionate-formation during the oxidation of thiosulfate to sulfate.

|                          |                             |                                                                                    | Sediment-depth (in cmbsf)                                          |      |      |      |      |      |      |      |      |      |      |      |      |
|--------------------------|-----------------------------|------------------------------------------------------------------------------------|--------------------------------------------------------------------|------|------|------|------|------|------|------|------|------|------|------|------|
| Genera                   | Reference                   | Tetrathionate forming phenotype                                                    | 2                                                                  | 30   | 45   | 60   | 75   | 90   | 120  | 135  | 160  | 175  | 220  | 250  | 275  |
|                          |                             |                                                                                    | Mean relative abundance (as percentage of total metagenomic reads) |      |      |      |      |      |      |      |      |      |      |      |      |
| <i>Acidithiobacillus</i> | (Hedrich and Johnson, 2013) | (i) $S_2O_3 \rightarrow S_4O_6 \rightarrow SO_4$<br>(ii) $S_4O_6 \rightarrow SO_4$ | 0.06                                                               | 0.08 | 0.11 | 0.09 | 0.15 | 0.18 | 0.19 | 0.20 | 0.28 | 0.23 | 0.34 | 0.16 | 0.12 |
| <i>Advenella</i>         | (Ghosh et al., 2005)        |                                                                                    | 0.00                                                               | 0.01 | 0.00 | 0.00 | 0.00 | 0.00 | 0.00 | 0.00 | 0.00 | 0.00 | 0.01 | 0.00 | 0.00 |
| <i>Halothiobacillus</i>  | (Sievert et al., 2000)      |                                                                                    | 0.07                                                               | 0.13 | 0.26 | 0.18 | 0.27 | 0.37 | 0.35 | 0.39 | 0.92 | 0.52 | 0.55 | 5.98 | 2.58 |
| <i>Paracoccus</i>        | (Rameez et al., 2019)       |                                                                                    | 0.18                                                               | 0.53 | 0.53 | 0.60 | 0.28 | 0.16 | 0.18 | 0.15 | 0.20 | 0.09 | 0.11 | 0.71 | 0.35 |
| <i>Pusillimonas</i>      | This study                  |                                                                                    | 0.51                                                               | 0.42 | 0.39 | 0.37 | 0.03 | 0.03 | 0.56 | 0.03 | 0.00 | 0.48 | 1.05 | 0.43 | 0.48 |
| <i>Thiomicrospira</i>    | (Watsuji et al., 2016)      |                                                                                    | 0.21                                                               | 0.35 | 0.58 | 0.43 | 0.76 | 1.00 | 0.88 | 0.86 | 1.31 | 1.32 | 1.55 | 0.51 | 0.55 |
| Total percentage         |                             |                                                                                    | 1.03                                                               | 1.52 | 1.87 | 1.67 | 1.49 | 1.74 | 2.16 | 1.63 | 2.71 | 2.64 | 3.61 | 7.79 | 4.08 |

**Table S10.** Relative abundance, along SSK42/5, for such genera, some member species/strains of which have been reported for the oxidation of tetrathionate to sulfate.

|                         |                                           |                                                 | Sediment-depth (in cmbsf)                                          |      |      |      |      |      |      |      |      |      |      |      |
|-------------------------|-------------------------------------------|-------------------------------------------------|--------------------------------------------------------------------|------|------|------|------|------|------|------|------|------|------|------|
| Genera                  | Reference                                 | Tetrathionate oxidation phenotype               | 0                                                                  | 15   | 45   | 60   | 90   | 120  | 140  | 160  | 190  | 220  | 260  | 295  |
|                         |                                           |                                                 | Mean relative abundance (as percentage of total metagenomic reads) |      |      |      |      |      |      |      |      |      |      |      |
| <i>Bosea</i>            | (Das et al., 1996)                        | S <sub>4</sub> O <sub>6</sub> → SO <sub>4</sub> | 0.00                                                               | 0.00 | 0.01 | 0.00 | 0.00 | 0.00 | 0.00 | 0.01 | 0.00 | 0.01 | 0.00 | 0.00 |
| <i>Burkholderia</i>     | (Wittke et al., 1997)                     |                                                 | 0.00                                                               | 0.71 | 0.64 | 0.87 | 1.15 | 1.01 | 0.78 | 1.02 | 0.78 | 0.94 | 0.81 | 1.01 |
| <i>Campylobacter</i>    | (Voordouw et al., 1996)                   |                                                 | 0.06                                                               | 0.06 | 0.05 | 0.06 | 0.04 | 0.06 | 0.09 | 0.05 | 0.19 | 0.07 | 0.09 | 0.04 |
| <i>Hydrogenovibrio</i>  | (Nishihara et al., 1991)                  |                                                 | 0.00                                                               | 0.00 | 0.00 | 0.00 | 0.00 | 0.00 | 0.00 | 0.00 | 0.00 | 0.00 | 0.00 | 0.00 |
| <i>Pandoraea</i>        | (Anandham et al., 2010)                   |                                                 | 0.00                                                               | 0.01 | 0.00 | 0.01 | 0.00 | 0.00 | 0.01 | 0.00 | 0.00 | 0.01 | 0.00 | 0.00 |
| <i>Paracoccus</i>       | (Ghosh et al., 2006; Rameez et al., 2019) |                                                 | 0.05                                                               | 0.21 | 1.13 | 0.35 | 0.09 | 0.11 | 0.07 | 0.21 | 0.08 | 0.33 | 0.07 | 0.12 |
| <i>Pseudaminobacter</i> | (Lahiri et al., 2006)                     |                                                 | 0.00                                                               | 0.00 | 0.01 | 0.00 | 0.00 | 0.00 | 0.01 | 0.00 | 0.00 | 0.01 | 0.00 | 0.00 |
| <i>Sulfurivirga</i>     | (Takai et al., 2006)                      |                                                 | 0.00                                                               | 0.00 | 0.00 | 0.01 | 0.00 | 0.00 | 0.00 | 0.00 | 0.01 | 0.00 | 0.01 | 0.00 |
| <i>Thiobacillus</i>     | (Wood and Kelly, 1991)                    |                                                 | 0.08                                                               | 0.07 | 0.17 | 0.25 | 1.59 | 1.47 | 0.80 | 0.91 | 0.75 | 1.24 | 0.73 | 1.26 |
| <i>Thiohalorhabdus</i>  | (Sorokin et al., 2008)                    |                                                 | 0.00                                                               | 0.00 | 0.01 | 0.00 | 0.00 | 0.00 | 0.01 | 0.00 | 0.00 | 0.01 | 0.00 | 0.00 |
| Total percentage        |                                           |                                                 | 0.19                                                               | 1.06 | 2.02 | 1.55 | 2.87 | 2.65 | 1.77 | 2.2  | 1.81 | 2.62 | 1.71 | 2.43 |

**Table S11.** Relative abundance, along SSK42/6, for such genera, some member species/strains of which have been reported for the oxidation of tetrathionate to sulfate.

|                         |                                              |                                                 | Sediment-depth (in cmbsf)                                    |      |      |      |      |      |      |      |      |      |      |      |      |
|-------------------------|----------------------------------------------|-------------------------------------------------|--------------------------------------------------------------|------|------|------|------|------|------|------|------|------|------|------|------|
| Genera                  | Reference                                    | Tetrathionate<br>oxidation<br>phenotype         | 2                                                            | 30   | 45   | 60   | 75   | 90   | 120  | 135  | 160  | 175  | 220  | 250  | 275  |
|                         |                                              |                                                 | Mean relative abundance (as percentage of metagenomic reads) |      |      |      |      |      |      |      |      |      |      |      |      |
| <i>Bosea</i>            | (Das et al., 1996)                           | S <sub>4</sub> O <sub>6</sub> → SO <sub>4</sub> | 0.00                                                         | 0.01 | 0.00 | 0.01 | 0.00 | 0.00 | 0.00 | 0.01 | 0.00 | 0.00 | 0.00 | 0.00 | 0    |
| <i>Burkholderia</i>     | (Wittke et al., 1997)                        |                                                 | 0.54                                                         | 0.86 | 0.93 | 0.75 | 0.87 | 0.91 | 0.87 | 1.33 | 0.82 | 1.00 | 0.96 | 0.66 | 1.28 |
| <i>Campylobacter</i>    | (Voordouw et al., 1996)                      |                                                 | 0.06                                                         | 0.05 | 0.05 | 0.04 | 0.06 | 0.07 | 0.08 | 0.11 | 0.05 | 0.04 | 0.02 | 0.04 | 0.03 |
| <i>Hydrogenovibrio</i>  | (Nishilhara et al., 1991)                    |                                                 | 0.00                                                         | 0.00 | 0.00 | 0.00 | 0.00 | 0.00 | 0.00 | 0.00 | 0.03 | 0.02 | 0.04 | 0.00 | 0.00 |
| <i>Pandoraea</i>        | (Anandham et al., 2010)                      |                                                 | 0.00                                                         | 0.00 | 0.01 | 0.00 | 0.00 | 0.01 | 0.00 | 0.00 | 0.00 | 0.00 | 0.01 | 0.00 | 0.00 |
| <i>Paracoccus</i>       | (Ghosh et al., 2006;<br>Rameez et al., 2019) |                                                 | 0.18                                                         | 0.53 | 0.53 | 0.60 | 0.28 | 0.16 | 0.18 | 0.15 | 0.20 | 0.09 | 0.11 | 0.71 | 0.35 |
| <i>Pseudaminobacter</i> | (Lahiri et al., 2006)                        |                                                 | 0.00                                                         | 0.00 | 0.00 | 0.00 | 0.00 | 0.00 | 0.00 | 0.00 | 0.00 | 0.00 | 0.00 | 0.00 | 0.00 |
| <i>Sulfurivirga</i>     | (Takai et al., 2006)                         |                                                 | 0.01                                                         | 0.00 | 0.00 | 0.00 | 0.01 | 0.00 | 0.00 | 0.00 | 0.01 | 0.00 | 0.00 | 0.00 | 0.00 |
| <i>Thiobacillus</i>     | (Wood and Kelly, 1991)                       |                                                 | 0.22                                                         | 0.34 | 0.66 | 0.47 | 0.91 | 1.19 | 1.02 | 0.92 | 0.98 | 1.27 | 1.26 | 0.31 | 0.34 |
| <i>Thiohalorhabdus</i>  | (Sorokin et al., 2008)                       |                                                 | 0.00                                                         | 0.00 | 0.01 | 0.00 | 0.00 | 0.00 | 0.00 | 0.01 | 0.00 | 0.00 | 0.01 | 0.00 | 0.00 |
| Total percentage        |                                              |                                                 | 1.01                                                         | 1.79 | 2.19 | 1.87 | 2.13 | 2.34 | 2.15 | 2.53 | 2.09 | 2.42 | 2.41 | 1.72 | 2    |

**Table S12.** Relative abundance, along SSK42/5, for such genera, some member species/strains of which have been reported for the reduction of tetrathionate to thiosulfate or sulfide.

|                         |                           |                                              | Sediment-depth (in cmbsf)                                          |      |      |      |      |      |      |      |      |      |      |      |
|-------------------------|---------------------------|----------------------------------------------|--------------------------------------------------------------------|------|------|------|------|------|------|------|------|------|------|------|
| Genera                  | Reference                 | Tetrathionate reducing phenotype             | 0                                                                  | 15   | 45   | 60   | 90   | 120  | 140  | 160  | 190  | 220  | 260  | 295  |
|                         |                           |                                              | Mean relative abundance (as percentage of total metagenomic reads) |      |      |      |      |      |      |      |      |      |      |      |
| <i>Alcaligenes</i>      | (Barrett and Clark, 1987) | $S_4O_6 \rightarrow S_2O_3$                  | 0.00                                                               | 0.01 | 0.00 | 0.00 | 0.00 | 0.02 | 0.00 | 0.00 | 0.00 | 0.01 | 0.00 | 0.00 |
| <i>Alteromonas</i>      | (Barrett and Clark, 1987) | $S_4O_6 \rightarrow S_2O_3 \rightarrow H_2S$ | 0.18                                                               | 0.13 | 0.08 | 0.14 | 0.23 | 0.21 | 0.06 | 0.26 | 0.33 | 0.23 | 0.31 | 0.27 |
| <i>Desulfotomaculum</i> | (Barrett and Clark, 1987) | $S_4O_6 \rightarrow S_2O_3 \rightarrow H_2S$ | 0.32                                                               | 0.28 | 0.28 | 0.15 | 0.20 | 0.23 | 0.40 | 0.08 | 0.16 | 0.21 | 0.08 | 0.05 |
| <i>Desulfovibrio</i>    | (Barrett and Clark, 1987) | $S_4O_6 \rightarrow S_2O_3$                  | 0.49                                                               | 0.47 | 0.40 | 0.40 | 0.38 | 0.58 | 0.73 | 0.32 | 0.36 | 0.20 | 0.29 | 0.23 |
| <i>Edwardsiella</i>     | (Barrett and Clark, 1987) | $S_4O_6 \rightarrow S_2O_3 \rightarrow H_2S$ | 0.03                                                               | 0.02 | 0.02 | 0.02 | 0.08 | 0.08 | 0.05 | 0.06 | 0.05 | 0.07 | 0.07 | 0.08 |
| <i>Morganella</i>       | (Barrett and Clark, 1987) | $S_4O_6 \rightarrow S_2O_3 \rightarrow H_2S$ | 0.00                                                               | 0.00 | 0.00 | 0.01 | 0.00 | 0.00 | 0.00 | 0.00 | 0.00 | 0.01 | 0.00 | 0.00 |
| <i>Pasteurella</i>      | (Barrett and Clark, 1987) | $S_4O_6 \rightarrow S_2O_3 \rightarrow H_2S$ | 0.03                                                               | 0.02 | 0.02 | 0.03 | 0.06 | 0.08 | 0.00 | 0.08 | 0.09 | 0.10 | 0.09 | 0.09 |
| <i>Providencia</i>      | (Barrett and Clark, 1987) | $S_4O_6 \rightarrow S_2O_3 \rightarrow H_2S$ | 0.03                                                               | 0.02 | 0.03 | 0.02 | 0.07 | 0.08 | 0.06 | 0.08 | 0.09 | 0.10 | 0.05 | 0.09 |
| <i>Serratia</i>         | (Barrett and Clark, 1987) | $S_4O_6 \rightarrow S_2O_3 \rightarrow H_2S$ | 0.08                                                               | 0.06 | 0.06 | 0.07 | 0.15 | 0.14 | 0.11 | 0.15 | 0.14 | 0.15 | 0.20 | 0.14 |
| <i>Shewanella</i>       | (Barrett and Clark, 1987) | $S_4O_6 \rightarrow S_2O_3$                  | 1.21                                                               | 0.83 | 0.70 | 1.26 | 1.87 | 1.84 | 1.69 | 2.09 | 3.42 | 2.00 | 3.04 | 3.50 |
| Total percentage        |                           |                                              | 2.37                                                               | 1.84 | 1.59 | 2.1  | 3.04 | 3.26 | 3.1  | 3.12 | 4.64 | 3.08 | 4.13 | 4.45 |

**Table S13.** Relative abundance, along SSK42/6, for such genera, some member species/strains of which have been reported for the reduction of tetrathionate to thiosulfate or sulfide.

|                         |                           |                                                                                  | Sediment depth (in cmbsf)                                    |      |      |      |      |      |      |      |      |      |      |      |      |
|-------------------------|---------------------------|----------------------------------------------------------------------------------|--------------------------------------------------------------|------|------|------|------|------|------|------|------|------|------|------|------|
| Genera                  | Reference                 | Tetrathionate reduction phenotype                                                | 2                                                            | 30   | 45   | 60   | 75   | 90   | 120  | 135  | 160  | 175  | 220  | 250  | 275  |
|                         |                           |                                                                                  | Mean relative abundance (as percentage of metagenomic reads) |      |      |      |      |      |      |      |      |      |      |      |      |
| <i>Alcaligenes</i>      | (Barrett and Clark, 1987) | S <sub>4</sub> O <sub>6</sub> → S <sub>2</sub> O <sub>3</sub>                    | 0.00                                                         | 0.01 | 0.00 | 0.00 | 0.44 | 0.00 | 0.00 | 0.00 | 0.01 | 0.00 | 0.01 | 0.02 | 0.01 |
| <i>Alteromonas</i>      | (Barrett and Clark, 1987) | S <sub>4</sub> O <sub>6</sub> → S <sub>2</sub> O <sub>3</sub> → H <sub>2</sub> S | 0.23                                                         | 0.19 | 0.22 | 0.19 | 0.28 | 0.31 | 0.27 | 0.36 | 0.23 | 0.30 | 0.23 | 0.17 | 0.23 |
| <i>Desulfotomaculum</i> | (Barrett and Clark, 1987) | S <sub>4</sub> O <sub>6</sub> → S <sub>2</sub> O <sub>3</sub> → H <sub>2</sub> S | 0.28                                                         | 0.12 | 0.09 | 0.10 | 0.10 | 0.08 | 0.13 | 0.10 | 0.11 | 0.03 | 0.03 | 0.06 | 0.04 |
| <i>Desulfovibrio</i>    | (Barrett and Clark, 1987) | S <sub>4</sub> O <sub>6</sub> → S <sub>2</sub> O <sub>3</sub>                    | 0.49                                                         | 0.26 | 0.27 | 0.24 | 0.33 | 0.23 | 0.31 | 0.33 | 0.37 | 0.23 | 0.11 | 0.15 | 0.19 |
| <i>Edwardsiella</i>     | (Barrett and Clark, 1987) | S <sub>4</sub> O <sub>6</sub> → S <sub>2</sub> O <sub>3</sub> → H <sub>2</sub> S | 0.03                                                         | 0.05 | 0.06 | 0.04 | 0.06 | 0.08 | 0.07 | 0.09 | 0.08 | 0.09 | 0.13 | 0.02 | 0.04 |
| <i>Morganella</i>       | (Barrett and Clark, 1987) | S <sub>4</sub> O <sub>6</sub> → S <sub>2</sub> O <sub>3</sub> → H <sub>2</sub> S | 0.00                                                         | 0.00 | 0.00 | 0.00 | 0.01 | 0.00 | 0.00 | 0.00 | 0.01 | 0.01 | 0.00 | 0.00 | 0.00 |
| <i>Pasteurella</i>      | (Barrett and Clark, 1987) | S <sub>4</sub> O <sub>6</sub> → S <sub>2</sub> O <sub>3</sub> → H <sub>2</sub> S | 0.04                                                         | 0.06 | 0.07 | 0.05 | 0.08 | 0.12 | 0.10 | 0.10 | 0.07 | 0.09 | 0.10 | 0.04 | 0.04 |
| <i>Providencia</i>      | (Barrett and Clark, 1987) | S <sub>4</sub> O <sub>6</sub> → S <sub>2</sub> O <sub>3</sub> → H <sub>2</sub> S | 0.04                                                         | 0.06 | 0.07 | 0.06 | 0.09 | 0.11 | 0.10 | 0.12 | 0.08 | 0.09 | 0.09 | 0.03 | 0.06 |
| <i>Serratia</i>         | (Barrett and Clark, 1987) | S <sub>4</sub> O <sub>6</sub> → S <sub>2</sub> O <sub>3</sub> → H <sub>2</sub> S | 0.08                                                         | 0.10 | 0.13 | 0.12 | 0.13 | 0.16 | 0.16 | 0.20 | 0.18 | 0.20 | 0.22 | 0.10 | 0.17 |
| <i>Shewanella</i>       | (Barrett and Clark, 1987) | S <sub>4</sub> O <sub>6</sub> → S <sub>2</sub> O <sub>3</sub>                    | 6.47                                                         | 2.32 | 2.47 | 1.64 | 2.38 | 3.29 | 5.59 | 3.69 | 2.03 | 2.53 | 2.38 | 0.77 | 1.13 |
| Total percentage        |                           |                                                                                  | 7.66                                                         | 3.17 | 3.38 | 2.44 | 3.9  | 4.38 | 6.73 | 4.99 | 3.17 | 3.57 | 3.3  | 1.36 | 1.91 |

**Table S14.** Rate of tetrathionate-formation in thiosulfate-containing chemolithotrophic ASWT medium by those sediment-samples of SSK42/5, which, in aerobic slurry culture experiments, oxidized thiosulfate only up to tetrathionate<sup>1</sup>.

| Sediment-depths explored<br>(in cmbsf) | Rate of tetrathionate formation<br>(in $\mu\text{mol S day}^{-1} \text{ g sediment}^{-1}$ ) |
|----------------------------------------|---------------------------------------------------------------------------------------------|
| 0                                      | 17.72                                                                                       |
| 15                                     | 6.65                                                                                        |
| 90                                     | 8.42                                                                                        |
| 160                                    | 6.45                                                                                        |

<sup>1</sup> These samples neither produced any sulfate from thiosulfate, nor further oxidized the tetrathionate produced from thiosulfate.

**Table S15.** Rate of formation, and subsequent oxidation (to sulfate), of tetrathionate during aerobic slurry incubation of various sediment-samples of SSK42/5 in thiosulfate-containing chemolithotrophic ASWT medium.

| Sediment-depths explored<br>(in cmbsf) | Rate of tetrathionate formation from<br>thiosulfate<br>(in $\mu\text{mol S day}^{-1} \text{ g sediment}^{-1}$ ) | Rate of oxidation of the tetrathionate<br>formed from thiosulfate<br>(in $\mu\text{mol S day}^{-1} \text{ g sediment}^{-1}$ ) |
|----------------------------------------|-----------------------------------------------------------------------------------------------------------------|-------------------------------------------------------------------------------------------------------------------------------|
| 45                                     | 1.11                                                                                                            | 5.86                                                                                                                          |
| 60                                     | 5.61                                                                                                            | 6.45                                                                                                                          |
| 295                                    | 6.45                                                                                                            | 13.75                                                                                                                         |

**Table S16.** Rate of tetrathionate-formation in thiosulfate-containing chemolithotrophic ASWT medium by those sediment-samples of SSK42/6 which, in aerobic slurry culture experiments, converted thiosulfate only to tetrathionate<sup>1</sup>.

| Sediment-depths explored<br>(in cmbsf) | Rate of tetrathionate formation<br>( $\mu\text{mol S day}^{-1} \text{ g sediment}^{-1}$ ) |
|----------------------------------------|-------------------------------------------------------------------------------------------|
| 120                                    | 29.71                                                                                     |
| 175                                    | 18.21                                                                                     |
| 275                                    | 17.2                                                                                      |

<sup>1</sup> These samples neither produced any sulfate from thiosulfate, nor further oxidized the tetrathionate produced from thiosulfate.

**Table S17.** Rate of formation, and subsequent oxidation (to sulfate), of tetrathionate during aerobic slurry incubation of various sediment-samples of SSK42/6 in thiosulfate-containing chemolithotrophic ASWT medium.

| Sediment-depths explored<br>(in cmbsf) | Rate of tetrathionate formation<br>(in $\mu\text{mol S day}^{-1} \text{ g sediment}^{-1}$ ) | Rate of tetrathionate<br>oxidation<br>(in $\mu\text{mol S day}^{-1} \text{ g sediment}^{-1}$ ) |
|----------------------------------------|---------------------------------------------------------------------------------------------|------------------------------------------------------------------------------------------------|
| 2                                      | 25.8                                                                                        | 54                                                                                             |
| 30                                     | 33.68                                                                                       | 48                                                                                             |
| 45                                     | 21.05                                                                                       | 24                                                                                             |

**Table S18.** Rate of oxidation of tetrathionate (to sulfate) during aerobic slurry incubation of various sediment-samples of SSK42/5 in tetrathionate-containing chemolithotrophic ASWTr medium.

| Sediment-depths explored<br>(in cmbsf) | Rate of tetrathionate oxidation<br>(in $\mu\text{mol S day}^{-1} \text{ g sediment}^{-1}$ ) |
|----------------------------------------|---------------------------------------------------------------------------------------------|
| 0                                      | 23.5                                                                                        |
| 15                                     | 4.75                                                                                        |
| 45                                     | 3.35                                                                                        |
| 90                                     | 4.9                                                                                         |
| 120                                    | 5.71                                                                                        |
| 160                                    | 2.5                                                                                         |
| 295                                    | 6.4                                                                                         |

**Table S19.** Rate of oxidation of tetrathionate (to sulfate) during aerobic slurry incubation of various sediment-samples of SSK42/6 in tetrathionate-containing chemolithotrophic ASWTr medium.

| Sediment-depths explored<br>(in cmbsf) | Rate of tetrathionate oxidation<br>(in $\mu\text{mol S day}^{-1} \text{ g sediment}^{-1}$ ) |
|----------------------------------------|---------------------------------------------------------------------------------------------|
| 2                                      | 141                                                                                         |
| 30                                     | 141                                                                                         |
| 45                                     | 140                                                                                         |
| 60                                     | 141                                                                                         |
| 75                                     | 140                                                                                         |
| 90                                     | 141                                                                                         |
| 120                                    | 41                                                                                          |
| 135                                    | 40                                                                                          |
| 160                                    | 41                                                                                          |
| 175                                    | 40                                                                                          |
| 220                                    | 75                                                                                          |
| 250                                    | 77                                                                                          |
| 275                                    | 75                                                                                          |

**Table S21.** Rate of reduction of tetrathionate (to thiosulfate) during anaerobic slurry incubation of various sediment-samples of SSK42/5 in tetrathionate-containing heterotrophic RVTr medium.

| Sediment-depths explored<br>(in cmbsf) | Rate of tetrathionate reduction<br>(in $\mu\text{mol S day}^{-1} \text{ g sediment}^{-1}$ ) |
|----------------------------------------|---------------------------------------------------------------------------------------------|
| 0                                      | 0.25                                                                                        |
| 15                                     | 0.21                                                                                        |
| 45                                     | 0.27                                                                                        |
| 60                                     | 0.27                                                                                        |
| 90                                     | 0.26                                                                                        |
| 120                                    | 0.24                                                                                        |
| 140                                    | 0.28                                                                                        |
| 160                                    | 0.20                                                                                        |
| 190                                    | 0.34                                                                                        |
| 220                                    | 0.24                                                                                        |
| 260                                    | 0.31                                                                                        |
| 295                                    | 0.31                                                                                        |

**Table S22.** Rate of reduction of tetrathionate (to thiosulfate) during anaerobic slurry incubation of various sediment-samples of SSK42/6 in tetrathionate-containing heterotrophic RVTr medium.

| Sediment-depths explored<br>(in cmbsf) | Rate of tetrathionate reduction<br>(in $\mu\text{mol S day}^{-1} \text{ g sediment}^{-1}$ ) |
|----------------------------------------|---------------------------------------------------------------------------------------------|
| 2                                      | 0.35                                                                                        |
| 30                                     | 0.28                                                                                        |
| 45                                     | 0.5                                                                                         |
| 60                                     | 0.58                                                                                        |
| 75                                     | 0.49                                                                                        |
| 90                                     | 0.86                                                                                        |
| 120                                    | 1.2                                                                                         |
| 135                                    | 1.28                                                                                        |
| 160                                    | 1.30                                                                                        |
| 175                                    | 1.35                                                                                        |
| 220                                    | 1.5                                                                                         |
| 250                                    | 1.62                                                                                        |
| 275                                    | 1.70                                                                                        |



**Table S24.** Concentrations of sulfate<sup>1</sup>, sulfide<sup>1</sup> and thiosulfate in the individual sample-sites of SSK42/5 and SSK42/6.

| Sediment-depth<br>(cmbsf) | SSK42/5         |                       |                           | Sediment-depth<br>(cmbsf) | SSK42/6         |                       |                           |
|---------------------------|-----------------|-----------------------|---------------------------|---------------------------|-----------------|-----------------------|---------------------------|
|                           | Sulfate<br>(mM) | Sulfide<br>( $\mu$ M) | Thiosulfate<br>( $\mu$ M) |                           | Sulfate<br>(mM) | Sulfide<br>( $\mu$ M) | Thiosulfate<br>( $\mu$ M) |
| 1                         | 28.83           | 62.08                 | 0.98                      | 1                         | 27.67           | 0                     | 0                         |
| 15                        | 27.93           | 57.26                 | 0.99                      | 15                        | 25.49           | 0                     | 0                         |
| 30                        | 25.77           | 59.32                 | -                         | 30                        | 26.67           | 321.32                | 2.5                       |
| 45                        | 23.19           | 61.39                 | 0.99                      | 45                        | 23.10           | 603.25                | 5.2                       |
| 60                        | 22.45           | 99.24                 | 1.5                       | 60                        | 20.80           | 586.36                | 4.7                       |
| 75                        | 19.71           | 194.22                | -                         | 75                        | 18.82           | 710.18                | -                         |
| 90                        | 17.26           | 313.30                | 4.2                       | 90                        | 17.27           | 1070.38               | 8.2                       |
| 105                       | 17.64           | 427.00                | -                         | 105                       | 16.42           | 507.57                | -                         |
| 120                       | 16.27           | 226.57                | 4.0                       | 120                       | 15.38           | 772.09                | 7.5                       |
| 135                       | 15.83           | 254.93                | -                         | 135                       | 14.43           | 704.55                | 7                         |
| 145                       | 14.79           | 296.78                | 3.1                       | 145                       | 13.40           | 1172.73               | -                         |
| 160                       | 13.02           | 270.07                | 3.5                       | 160                       | 12.18           | 1037.66               | 8.5                       |
| 175                       | 13.00           | 183.90                | -                         | 175                       | 10.17           | 1071.43               | 8.1                       |
| 190                       | 11.04           | 154.30                | 3.2                       | 190                       | 9.29            | 947.61                | -                         |
| 205                       | 10.55           | 203.86                | -                         | 205                       | 7.46            | 1341.58               | -                         |
| 220                       | 9.64            | 61.39                 | 1.1                       | 220                       | 5.61            | 1274.04               | 11.1                      |
| 235                       | 8.35            | 54.51                 | -                         | 235                       | 4.18            | 1240.27               | -                         |
| 250                       | 6.65            | 58.64                 | 1.2                       | 250                       | 2.04            | 2010.27               | -                         |
| 280                       | 4.38            | 54.51                 | -                         | 265                       | 0.87            | 970.12                | 6.8                       |
| 295                       | 7.46            | 51.75                 | 1.1                       | 280                       | 0.28            | 1217.76               | 5.5                       |
|                           |                 |                       |                           | 295                       | 0.47            | 1116.45               | -                         |

<sup>1</sup>Data for pore-water sulfate and sulfide concentrations were taken from Fernandes et al. (2018); values for thiosulfate concentration was determined in this study.

## Supplementary References

- Anandham, R., Indiragandhi, P., Kwon, S. W., Sa, T. M., Jeon, C. O., Kim, Y. K., and Jee H. J.: *Pandoraea thiooxydans* sp. nov., a facultatively chemolithotrophic, thiosulfate-oxidizing bacterium isolated from rhizosphere soils of sesame (*Sesamum indicum* L.). *Int. J. Syst. Evol. Microbiol.*, 60, 21-26, <https://doi.org/10.1099/ij.s.0.012823-0>, 2010.
- Barrett, E. L and Clark, M. A.: Tetrathionate reduction and production of hydrogen sulfide from thiosulfate. *Microbiol. Rev.*, 51, 192-205, <https://mmbr.asm.org/content/51/2/192>, 1987.
- Das, S. K., Mishra, A. K., Tindall, B. J., Rainey, F. A., and Stackebrandt, E.: Oxidation of thiosulfate by a new bacterium, *Bosea thiooxidans*. (strain BI-42) gen. nov., sp. nov.: analysis of phylogeny based on chemotaxonomy and 16S ribosomal DNA sequencing, *Int. J. Syst. Evol. Microbiol.*, 46, 981-987, <https://doi.org/10.1099/00207713-46-4-981>, 1996.
- Euzéby, J. P.: List of Bacterial Names with Standing in Nomenclature: a folder available on the Internet, *Int. J. Syst. Evol. Microbiol.*, 47, 590-592, <https://doi.org/10.1099/00207713-47-2-590>, 1997.
- Gerhardt, P.: Methods for general and molecular bacteriology, 791. ASM Press, Washington DC, 1994.
- Ghosh, W., Bagchi, A., Mandal, S., Dam, B., and Roy, P.: *Tetrathibacter kashmirensis* gen. nov., sp. nov., a novel mesophilic, neutrophilic, tetrathionate-oxidizing, facultatively chemolithotrophic betaproteobacterium isolated from soil from a temperate orchard in Jammu and Kashmir, India, *Int. J. Syst. Evol. Microbiol.*, 55, 1779-1787, <https://doi.org/10.1099/ij.s.0.63595-0>, 2005.
- Ghosh, W., Mandal, S., and Roy, P.: *Paracoccus bengalensis* sp. nov., a novel sulfur-oxidizing chemolithoautotroph from the rhizospheric soil of an Indian tropical leguminous plant, *Syst. Appl. Microbiol.*, 29, 396-403, <https://doi.org/10.1016/j.syapm.2005.10.004>, 2006.
- Hedrich, S., and Johnson, D. B.: *Acidithiobacillus ferridurans* sp. nov., an acidophilic iron-, sulfur- and hydrogen-metabolizing chemolithotrophic gammaproteobacterium, *Int. J. Syst. Evol. Microbiol.*, 63, 4018-4025, <https://doi.org/10.1099/ij.s.0.049759-0>, 2013.
- Lahiri, C., Mandal, S., Ghosh, W., Dam, B., and Roy, P.: A novel gene cluster *soxSRT* is essential for the chemolithotrophic oxidation of thiosulfate and tetrathionate by *Pseudaminobacter salicylatoxidans* KCT001, *Curr. Microbiol.*, 52, 267-273, <https://doi.org/10.1007/s00284-005-0176-x>, 2006.
- Nishihara, H., Igarashi, Y., and Kodama, T.: *Hydrogenovibrio marinus* gen. nov., sp. nov., a marine obligately chemolithoautotrophic hydrogen-oxidizing bacterium, *Int. J. Syst. Evol. Microbiol.*, 41, 130-133, <https://doi.org/10.1099/00207713-41-1-130>, 1991.
- Parte, A. C.: LPSN—list of prokaryotic names with standing in nomenclature. *Nucleic Acids Res.*, 42, 613-616, <https://doi.org/10.1093/nar/gkt1111>, 2013.
- Rameez, M.J., Pyne, P., Mandal, S., Chatterjee, S., Alam, M., Bhattacharya, S., Mondal, N., Sarkar, J. and Ghosh, W.: Two pathways for thiosulfate oxidation in the alphaproteobacterial chemolithotroph *Paracoccus thiocyanatus* SST, *Microbiol. Res.*, 230, 126345, <https://doi.org/10.1016/j.micres.2019.126345>, 2019.
- Sass, H., Steuber, J., Kroder, M., Kroneck, P. M. H., and Cypionka, H.: Formation of thionates by freshwater and marine strains of sulfate-reducing bacteria, *Arch. Microbiol.*, 158, 418-421, <https://doi.org/10.1007/BF00276302>, 1992.
- Sievert, S. M., Heidorn, T., and Kuever, J.: *Halothiobacillus kellyi* sp. nov., a mesophilic, obligately chemolithoautotrophic, sulfur-oxidizing bacterium isolated from a shallow-water hydrothermal vent in the Aegean Sea, and emended description of the genus *Halothiobacillus*. *Int. J. Syst. Evol. Microbiol.*, 50, 1229-1237, <https://doi.org/10.1099/00207713-50-3-1229>, 2000.
- Sorokin, D. Y., Tourova, T. P., Galinski, E. A., Muyzer, G., and Kuenen, J. G. *Thiohalorhabdus denitrificans* gen. nov., sp. nov., an extremely halophilic, sulfur-oxidizing, deep-lineage gammaproteobacterium from hypersaline habitats, *Int. J. Syst. Evol. Microbiol.*, 58, 2890-2897, <https://doi.org/10.1099/ij.s.0.2008/000166-0>, 2008.
- Takai, K., Miyazaki, M., Nunoura, T., Hirayama, H., Oida, H., Furushima, Y., Yamamoto, H., and Horikoshi, K.: *Sulfurivirga caldicurallii* gen. nov., sp. nov., a novel microaerobic, thermophilic, thiosulfate-oxidizing chemolithoautotroph, isolated from a shallow marine hydrothermal system occurring in a coral reef, Japan, *Int. J. Syst. Evol. Microbiol.*, 56, 1921-1929, <https://doi.org/10.1099/ij.s.0.64297-0>, 2006.
- Wood, A. P and Kelly, D. P: Isolation and characterisation of *Thiobacillus halophilus* sp. nov., a sulphur-oxidising autotrophic eubacterium from a Western Australian hypersaline lake, *Arch. Microbiol.*, 156, 277-280, <https://doi.org/10.1007/BF00262998>, 1991.

- Wittke, R., Ludwig, W., Peiffer, S., and Kleiner, D.: 1997. Isolation and characterization of *Burkholderia norimbergensis* sp. nov., a mildly alkaliphilic sulfur oxidizer, Syst. Appl. Microbiol., 20, 549-553, [https://doi.org/10.1016/S0723-2020\(97\)80025-2](https://doi.org/10.1016/S0723-2020(97)80025-2), 1997.
- Watsuji, T. O., Had, E., Miyazaki, M., Ichimura, M., and Takai, K.: *Thiomicrospira hydrogeniphila* sp. nov., an aerobic, hydrogen-and sulfur-oxidizing chemolithoautotroph isolated from a seawater tank containing a block of beef tallow, Int. J. Syst. Evol. Microbiol., 66, 3688-3693, <https://doi: 10.1099/ijsem.0.001250>, 2016.
- Voordouw G., Armstrong SM., Reimer M. F., Fouts, B., Telang, A. J, Shen, Y. I. N., and Gevertz, D.: Characterization of 16S rRNA genes from oil field microbial communities indicates the presence of a variety of sulfate-reducing, fermentative, and sulfide-oxidizing bacteria, Appl. Environ. Microbiol., 62, 1623-1629, 1996.
